# Supplementary material for: DNA compaction enhances the sensitivity of fluorescence-based nucleic acid assays: a game changer in point of care sensors?
Source: Royal Society of Chemistry journal article supplement (doi:10.1039/d3an00102d), 2023-01-01
Supplement: d3an00102d1.pdf [file d3an00102d1.pdf]

## DNA Compaction Enhances Sensitivity of Fluorescence-Based Nucleic Acid Assays: Game changer in Point of Care Sensors?

Sujesh Sudarsan<sup>a‡</sup>, Anusha Prabhu<sup>a‡</sup>, Dinesh Prasad<sup>b</sup>, Naresh Kumar Mani<sup>a\*</sup>

### Supplementary Material

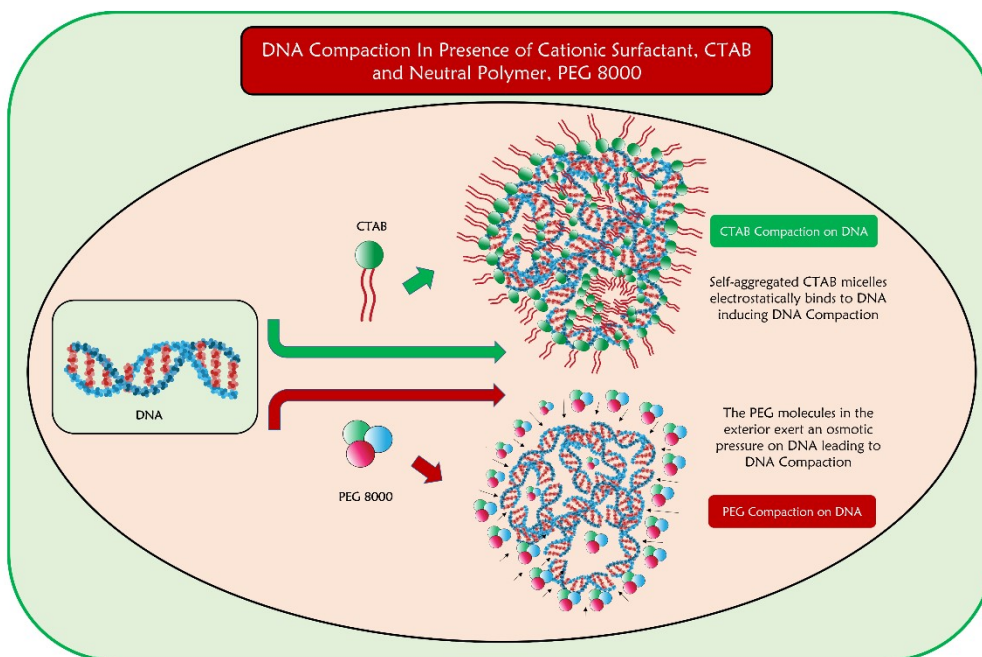

**Supplementary figure 1:** Schematic illustration showing the mechanism of compaction by the cationic surfactant, CTAB and neutral polymer, PEG 8000.

**Supplementary figure 2:** Fluorescence intensity of CTAB (200  $\mu$ M), CTAB (200  $\mu$ M) +SYTO amplic

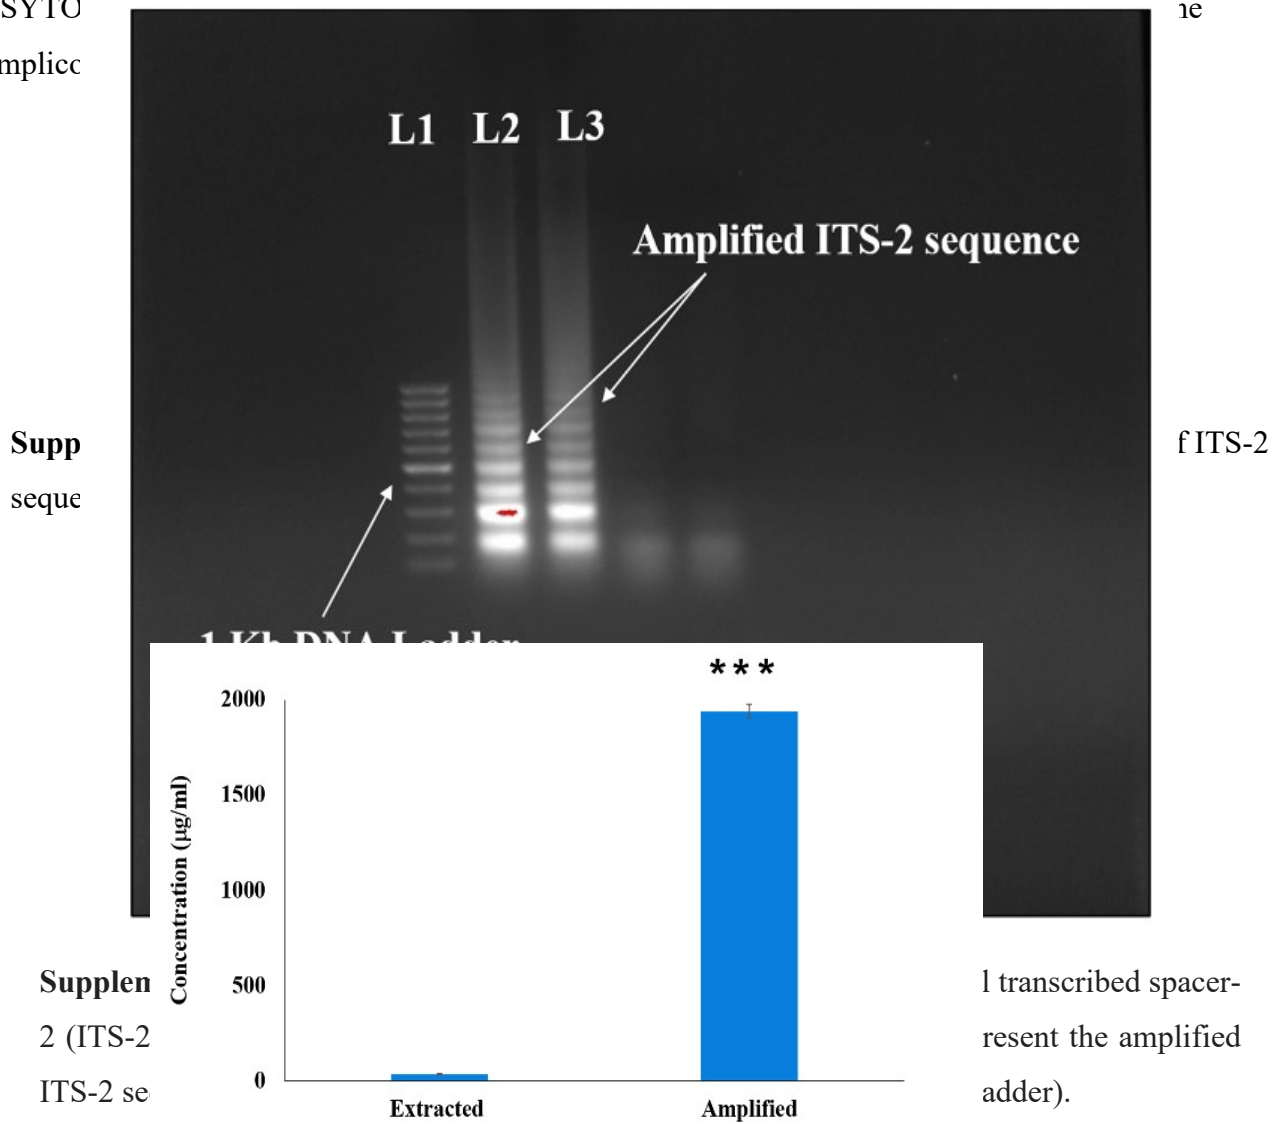

\*\*\* denotes  $p < 0.001$  for comparison between Extracted and Amplified

**Supplementary figure 4:** Concentration of extracted DNA and amplified ITS-2 sequence of *Candida albicans*.

| Limit of Detection (LOD) |                                                                                                |                                                                                                  |
|--------------------------|------------------------------------------------------------------------------------------------|--------------------------------------------------------------------------------------------------|
| Assay Type               | Compaction Agents                                                                              |                                                                                                  |
|                          | CTAB                                                                                           | PEG 8000                                                                                         |
| Spot                     | 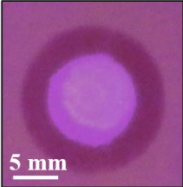<br>0.5 µg/ml | <br>0.4 µg/ml  |
| Distance-Based           | <br>0.5 µg/ml | <br>0.4 µg/ml |

**Supplementary table 1.** Primer sequence and length of primers for LAMP amplification of ITS-2 sequence of *C. albicans*

**Supplementary figure 5:** The Limit of Detection (LOD) of paper-based spot and distance-based assays.

| Assay Type     | Diluted amplicon concentrations (µg/ml)                                                        |                                                                                                |                                                                                                |                                                                                                  |                                                                                                  |
|----------------|------------------------------------------------------------------------------------------------|------------------------------------------------------------------------------------------------|------------------------------------------------------------------------------------------------|--------------------------------------------------------------------------------------------------|--------------------------------------------------------------------------------------------------|
|                | 0.5                                                                                            | 1                                                                                              | 5                                                                                              | 15                                                                                               | 39.65                                                                                            |
| Spot           | 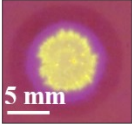<br>208.840 | <br>213.136 | <br>250.525 | <br>252.286 | <br>254.278 |
| Distance-Based | <br>7.79    | <br>15.0    | <br>26.4    | <br>33.0    | <br>38.6    |

**Supplementary figure 6:** The combinatorial effect of CTAB and PEG 8000 on fluorescence sensitivity and migration distance [(values in the spot assay correspond to the G Channel intensity and values in the distance-based assay represent the sample migration distance (mm))

| Primers | Sequence                                             | Length (bp) |
|---------|------------------------------------------------------|-------------|
| FIP     | CTACCGTCTTTCAAGCAAACCCATGAGCGTCGTTT<br>CTCCCT        | 41          |
| BIP     | TTGACAATGGCTTAGGTCTAACCAAAAGATATACG<br>TGGTGGACGTTAC | 48          |
| LB      | CTCAACACCAAACCCAGCGG                                 | 20          |
| F3      | TCTGGTATTCCGGAGGGC                                   | 18          |
| B3      | AGTCCTACCTGATTTGAGGT                                 | 20          |
